# Supplementary material for: Relationship between RANO-PRO Working Group standardised priority constructs and disease progression among malignant glioma patients: A retrospective cohort study
Source: PubMed Central journal article supplement — eClinicalMedicine. 2022 Nov 12;55:101718. doi: 10.1016/j.eclinm.2022.101718 (PMC9661442; doi:10.1016/j.eclinm.2022.101718), 2022-11-12
Supplement: mmc1.pdf [file mmc1.pdf]

## Supplementary materials

Supplementary table 1

| RANO-PRO priority constructs |                                        | MDASI-BT items                                     | EQ-5D-3L dimensions           |
|------------------------------|----------------------------------------|----------------------------------------------------|-------------------------------|
| Symptoms                     | Pain                                   | Pain                                               | Pain/Discomfort               |
|                              | Perceived cognition                    | Difficulty remembering<br>Difficulty concentrating |                               |
|                              | Seizures                               | Seizures                                           |                               |
|                              | Difficulty communicating               | Difficulty speaking<br>Difficulty understanding    |                               |
|                              | Symptomatic adverse event <sup>1</sup> | Fatigue <sup>1</sup>                               |                               |
| Physical functioning         | Weakness                               | Weakness on one side of body                       |                               |
|                              | Walking                                | Interference with walking                          | Mobility                      |
| Role/Social functioning      | Work                                   | Interference with work                             |                               |
|                              | Usual activities                       | Interference with general activity                 | Usual activities<br>Self-care |

Abbreviations: MDASI-BT=MD Anderson Symptom Inventory Brain Tumor Module; RANO-PRO= Response Assessment in Neuro-Oncology-Patient Reported Outcome

<sup>1</sup> Symptomatic adverse events are treatment-specific symptoms chosen among those expected for the treatment agent based on its prevalence and/or severity. Fatigue was chosen as an example of a symptomatic adverse event due to its high prevalence and severity among primary brain tumor patients.

**Supplementary table 2.**

| <b>Item</b>                        | <b>None-Mild to Moderate-to-Severe<br/>n, %</b> | <b>Moderate-to-Severe to None-Mild,<br/>n, %</b> | <b>Sig.</b> |
|------------------------------------|-------------------------------------------------|--------------------------------------------------|-------------|
| Pain                               | 12, 11                                          | 5, 5                                             | 0.14        |
| Difficulty remembering             | 22, 20                                          | 8, 7                                             | 0.016       |
| Difficulty concentrating           | 13, 12                                          | 4, 4                                             | 0.049       |
| Seizures                           | 5, 5                                            | 5, 5                                             | 1.00        |
| Difficulty understanding           | 19, 17                                          | 6, 5                                             | 0.015       |
| Difficulty speaking                | 9, 8                                            | 5, 5                                             | 0.42        |
| Fatigue*                           | 33, 30                                          | 13, 12                                           | 0.0045      |
| Weakness on one side of body       | 16, 14                                          | 5, 5                                             | 0.027       |
| Interference with walking*         | 26, 23                                          | 7, 6                                             | 0.0013      |
| Interference with work             | 24, 21                                          | 13, 12                                           | 0.099       |
| Interference with general activity | 29, 26                                          | 13, 12                                           | 0.020       |

Abbreviations: MDASI-BT=MD Anderson Symptom Inventory Brain Tumor Module;

Sig.=Significance level

\*Significant after Holms-Bonferroni adjustment, significance threshold  $\approx 0.005$

**Supplementary table 3.**

| <b>Item</b>                        | <b>Mean difference</b> | <b>95% CI of Difference</b> | <b>Effect size</b> | <b>Sig.</b> |
|------------------------------------|------------------------|-----------------------------|--------------------|-------------|
| Pain                               | -0.1                   | [-0.5, 0.3]                 | -0.03              | 0.76        |
| Difficulty remembering             | 0.4                    | [0.0, 0.8]                  | 0.15               | 0.044       |
| Difficulty concentrating           | 0.3                    | [-0.1, 0.7]                 | 0.12               | 0.17        |
| Seizures                           | 0.0                    | [-0.3, 0.4]                 | 0.02               | 0.84        |
| Difficulty understanding*          | 0.7                    | [0.3, 1.1]                  | 0.32               | 0.00088     |
| Difficulty speaking                | 0.3                    | [-0.1, 0.7]                 | 0.12               | 0.16        |
| Fatigue                            | 0.1                    | [-0.4, 0.7]                 | 0.05               | 0.60        |
| Weakness on one side of body       | 0.3                    | [-0.2, 0.8]                 | 0.13               | 0.18        |
| Interference with walking          | 0.0                    | [-0.4, 0.5]                 | 0.01               | 0.93        |
| Interference with work             | -0.4                   | [-1.0, 0.1]                 | -0.12              | 0.13        |
| Interference with general activity | 0.1                    | [-0.4, 0.5]                 | 0.02               | 0.76        |

Abbreviations: MDASI-BT=MD Anderson Symptom Inventory Brain Tumor Module;  
 CI=Confidence interval; Sig.=Significance level

Effect size: *Glass' Δ*. MDASI-BT Minimally Important Difference = 1 point

\*Significant after Holms-Bonferroni adjustment, significance threshold  $\approx 0.005$

**Supplementary table 4.**

| <b>Item</b>                             | <b>Mean difference</b> | <b>95% CI of Difference</b> | <b>Effect size</b> | <b>Sig.</b> |
|-----------------------------------------|------------------------|-----------------------------|--------------------|-------------|
| Nausea                                  | 0.3                    | [-0.2, 0.7]                 | 0.12               | 0.27        |
| Disturbed sleep                         | 0.5                    | [-0.2, 1.1]                 | 0.16               | 0.13        |
| Feeling distressed                      | 0.9                    | [0.2, 1.5]                  | 0.30               | 0.0069      |
| Shortness of breath                     | 0.2                    | [-0.3, 0.6]                 | 0.08               | 0.46        |
| Lack of appetite                        | 0.6                    | [0.1, 1.0]                  | 0.27               | 0.014       |
| Feeling drowsy*                         | 1.2                    | [0.6, 1.9]                  | 0.42               | 0.00017     |
| Dry mouth                               | 0.4                    | [-0.1, 1.0]                 | 0.17               | 0.12        |
| Feeling sad                             | 0.7                    | [0.1, 1.3]                  | 0.25               | 0.024       |
| Vomiting                                | 0.1                    | [-0.2, 0.5]                 | 0.07               | 0.50        |
| Numbness/Tingling                       | 0.7                    | [0.1, 1.3]                  | 0.24               | 0.030       |
| Vision                                  | 0.8                    | [0.2, 1.4]                  | 0.30               | 0.0081      |
| Change in appearance                    | 0.03                   | [-0.5, 0.4]                 | -0.01              | 0.92        |
| Change in bowel pattern                 | 0.5                    | [-0.03, 1.2]                | 0.20               | 0.062       |
| Irritability                            | 0.4                    | [-0.2, 1.0]                 | 0.13               | 0.23        |
| Interference with mood*                 | 0.9                    | [0.3, 1.5]                  | 0.34               | 0.0024      |
| Interference with relations with others | 0.8                    | [0.2, 1.4]                  | 0.27               | 0.015       |
| Interference with enjoyment of life*    | 1.1                    | [0.4, 1.7]                  | 0.36               | 0.0011      |

Abbreviations: MDASI-BT=MD Anderson Symptom Inventory Brain Tumor Module; CI=Confidence interval; Sig.=Significance level

Effect size: Hedges' *g*. MDASI-BT Minimally Important Difference = 1 point

\*Significant after Holms-Bonferroni adjustment, significance threshold  $\approx 0.003$

**Supplementary table 5.**

| <b>Item</b>                             | <b>Mean difference</b> | <b>95% CI of Difference</b> | <b>Effect size</b> | <b>Sig.</b> |
|-----------------------------------------|------------------------|-----------------------------|--------------------|-------------|
| Nausea                                  | 0.5                    | [0.1, 0.9]                  | 0.38               | 0.075       |
| Disturbed sleep                         | 0.7                    | [0.1, 1.3]                  | 0.26               | 0.028       |
| Feeling distressed*                     | 1.1                    | [0.5, 1.7]                  | 0.45               | 0.00032     |
| Shortness of breath                     | 0.5                    | [0.1, 0.9]                  | 0.32               | 0.019       |
| Lack of appetite                        | 0.3                    | [-0.2, 0.8]                 | 0.13               | 0.29        |
| Feeling drowsy*                         | 1.1                    | [0.5, 1.7]                  | 0.44               | 0.00024     |
| Dry mouth                               | 0.3                    | [-0.2, 0.9]                 | 0.15               | 0.18        |
| Feeling sad                             | 0.8                    | [0.2, 1.3]                  | 0.31               | 0.0071      |
| Vomiting                                | 0.0                    | [-0.3, 0.4]                 | 0.03               | 0.78        |
| Numbness/Tingling*                      | 0.6                    | [0.2, 1.0]                  | 0.28               | 0.0022      |
| Vision                                  | 0.5                    | [0.1, 1.0]                  | 0.21               | 0.028       |
| Change in appearance                    | 0.1                    | [-0.3, 0.4]                 | 0.05               | 0.61        |
| Change in bowel pattern                 | 0.1                    | [-0.5, 0.6]                 | 0.02               | 0.84        |
| Irritability                            | 0.3                    | [-0.2, 0.9]                 | 0.14               | 0.23        |
| Interference with mood                  | 0.6                    | [0.0, 1.2]                  | 0.24               | 0.040       |
| Interference with relations with others | 0.8                    | [0.1, 1.4]                  | 0.32               | 0.017       |
| Interference with enjoyment of life*    | 1.0                    | [0.4, 1.7]                  | 0.37               | 0.0014      |

Abbreviations: MDASI-BT=MD Anderson Symptom Inventory Brain Tumor Module;  
 CI=Confidence interval; Sig.=Significance level

Effect size: *Glass' Δ*. MDASI-BT Minimally Important Difference = 1 point

\*Significant after Holms-Bonferroni adjustment, significance threshold  $\approx 0.003$

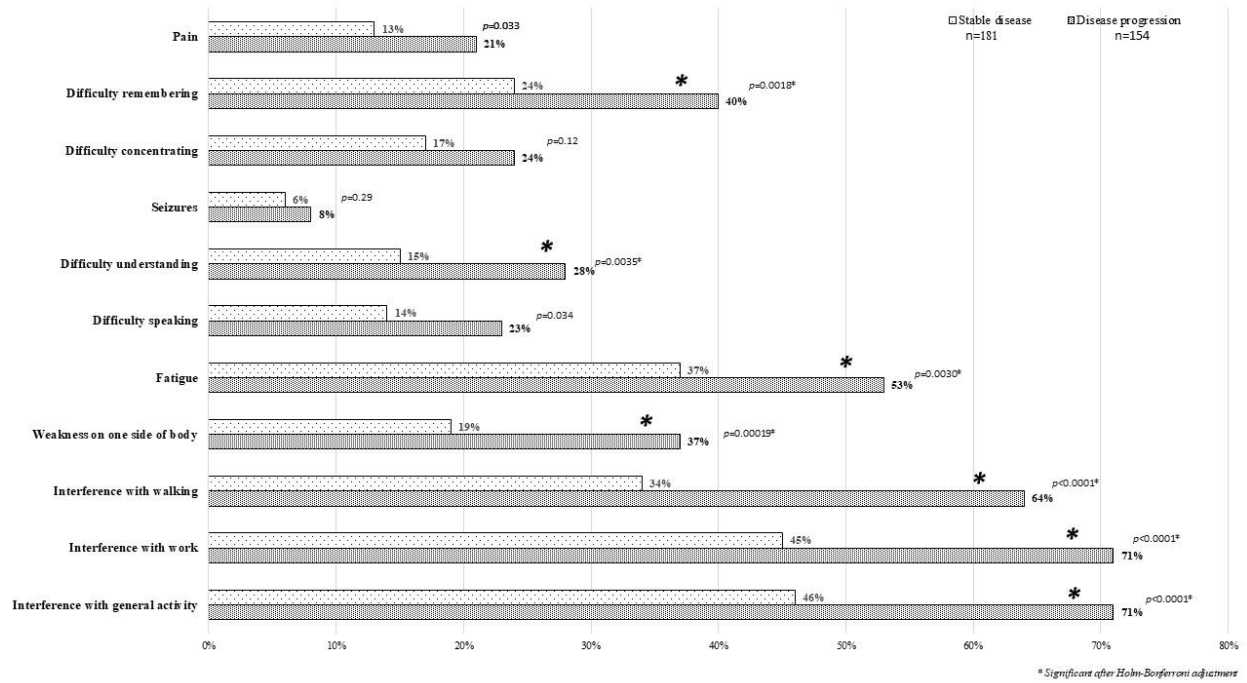

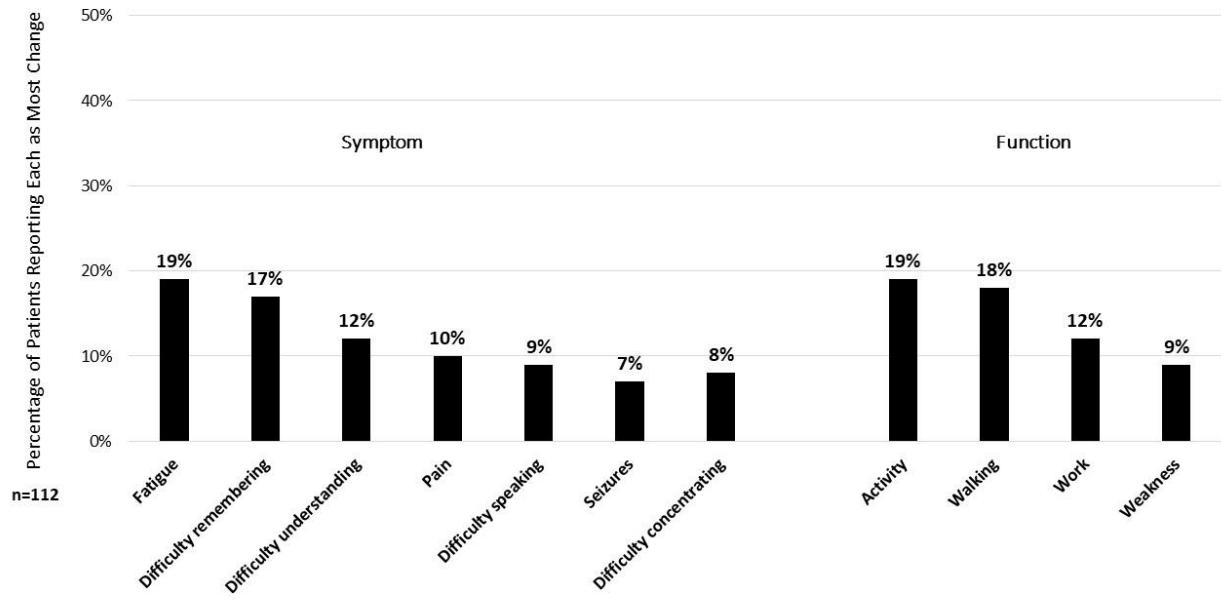

\*Multiple symptoms may have been reported with same change
